# Supplementary material for: Hollow carbon-shell/carbon-nanorod arrays for high performance Li-ion batteries and supercapacitors
Source: Royal Society of Chemistry journal article supplement (doi:10.1039/c4ra14683b), 2014-12-16
Supplement: c4ra14683b1.pdf [file c4ra14683b1.pdf]

## Electronic Supplementary Information

### Hollow carbon-shell/carbon-nanorods arrays for high performance

#### Li-ion batteries and supercapacitors

Shengbin Wang, Yalan Xing, Changlei Xiao, Xin Wei, Huaizhe Xu and Shichao Zhang\*

#### Experimental

##### *Synthesis*

The peanut-like MnO@C templates were prepared via a carbohydrate coating and graphitization process: 1.4 g of KMnO<sub>4</sub> was dissolved into 70 mL of deionized water with magnetic stirring, and then 3 mL of HCl (37 wt%) was added to the solution. The solution was transferred into a Teflon-lined stainless steel autoclave, heated at 140 °C for 12 h. The resulting product was separated, washed and dried to obtain the α-MnO<sub>2</sub> nanotubes hollow sphere. Then, 0.5 g of as-prepared α-MnO<sub>2</sub>, 5 g of glucose and 2 g of urea were dispersed into 70 mL of deionized water. The solution was placed into autoclave and heated at 120 °C for 5 h to harvest peanut-like α-MnO<sub>2</sub>@organic precursor. Finally, the peanut-like MnO@C was obtained by heating sample at 700 °C for 2 h with the heating-rate of 3°C min<sup>-1</sup>.

To achieve the N-HPC, 0.5 g MnO@C templates were immersed into 10 mL HCl (37 wt%) at room temperature for 8 h to remove the MnO.

##### *Structural Characterization*

Powder X-ray diffraction (XRD) data were collected on a Rigaku D/Max-2400 diffractometer with Cu Kα radiation. Scanning electron microscopy (SEM, Hitachi S-4800), transmission electron microscopy (TEM, JEM-2100F) and high-resolution TEM (HR-TEM, FEI, Tecnai G2 F20) were used to investigate the morphology and microstructure of the produce. The Brunauer-Emmett-Teller (BET) specific surface area was determined by nitrogen adsorption-desorption at 77 K using a Quantachrome

Autosorb-1C-VP Analyzer. The carbon and nitrogen contents were measured by Vario EL cube organic element analyzer. The Raman spectra was achieved on a labRAM ARAMIS laser Raman spectroscopy under a backscattering geometry. X-ray photoelectron spectra (XPS) were recorded on a Thermo VG ESCALAB250 X-ray photoelectron spectrometer.

### ***Electrochemical Characterization***

For the battery test, the working electrode was fabricated by 80% N-HPCs, 10% carbon black and 10% PVDF binder on copper-foil collector with active material loading of around  $1.5 \text{ mg cm}^{-2}$ . The obtained electrode, polyethylene separator and Li metal foil were assembled into a 2032 type coin cell filled with electrolytes (1 M LiPF<sub>6</sub> in ethylene carbonate-dimethyl carbonate) in Ar filled glove box. Cyclic voltammograms (CVs) were recorded on CHI 660D electrochemistry workstation at a scan rate of  $0.1 \text{ mV s}^{-1}$  between 0.01 and 3.0 V vs. Li<sup>+</sup>/Li. Electrochemical data were collected using NWEARE BTS-610 test system within the potential range of 0.01–3.0 V vs. Li<sup>+</sup>/Li at various current densities.

For supercapacitors test, the working electrode was fabricated by 80% N-HPCs, 10% carbon black and 10% PVDF binder on anikel foam. The loading mass of active materials was about  $5 \text{ mg cm}^{-2}$ . All the electrochemical measurements were used 3-electrode system with a voltage range of -1.0-0 (vs. Hg/HgO), the sample was used as the test electrode, platinum foil as the counter electrode, Hg/HgO electrode as reference electrode, and 1.0M KOH aqueous solution as electrolyte. CV curves were obtained by varying the scan rate from 5 to 100 m Vs<sup>-1</sup>. Electrochemical impedance spectroscopy (EIS) was measured in the frequency range of 10 mHz to 10 kHz. Charge-discharge measurements were carried out galvanostatically at 0.5-15.0 A g<sup>-1</sup>. The specific capacitances in the present case were calculated from galvanostatic

charge/discharge curves according to the following equation:  $C = \frac{I \times \Delta t}{m \times \Delta V}$

where  $C$  ( $F\ g^{-1}$ ) is the specific capacitance,  $I$  (A) refers to the discharge current,  $\Delta V$  (V) represents the potential change within the discharge time  $\Delta t$  (s), and  $m$  (g) corresponds to the amount of active material on the electrode.

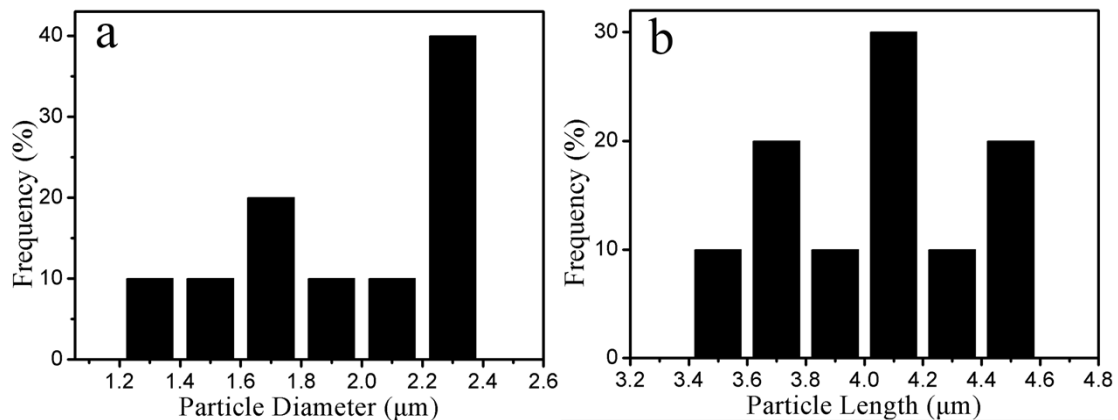

**Fig. S1.** a) Histogram of the diameter, and b) the length distribution of the N-HPC.

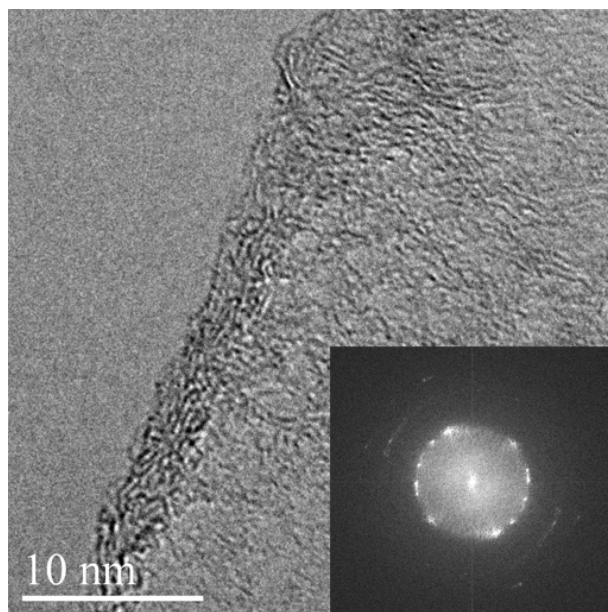

**Fig. S2.** HRTEM image of the N-HPC, the inset shows the SAD image.

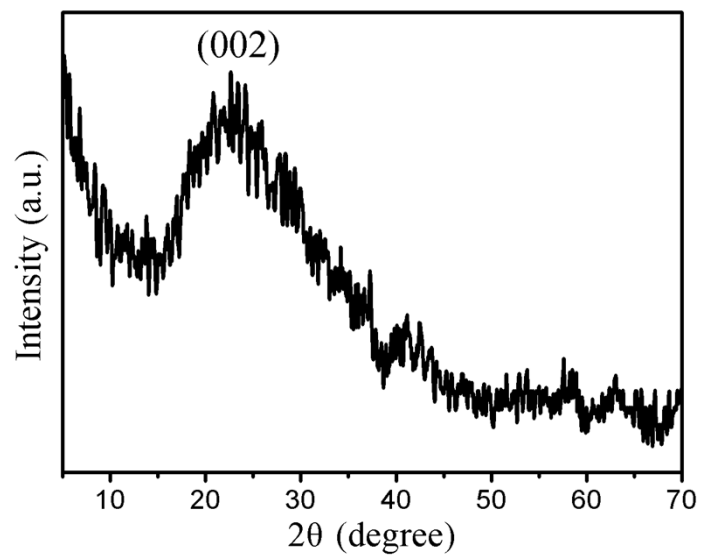

**Fig. S3.** XRD pattern of the N-HPC.

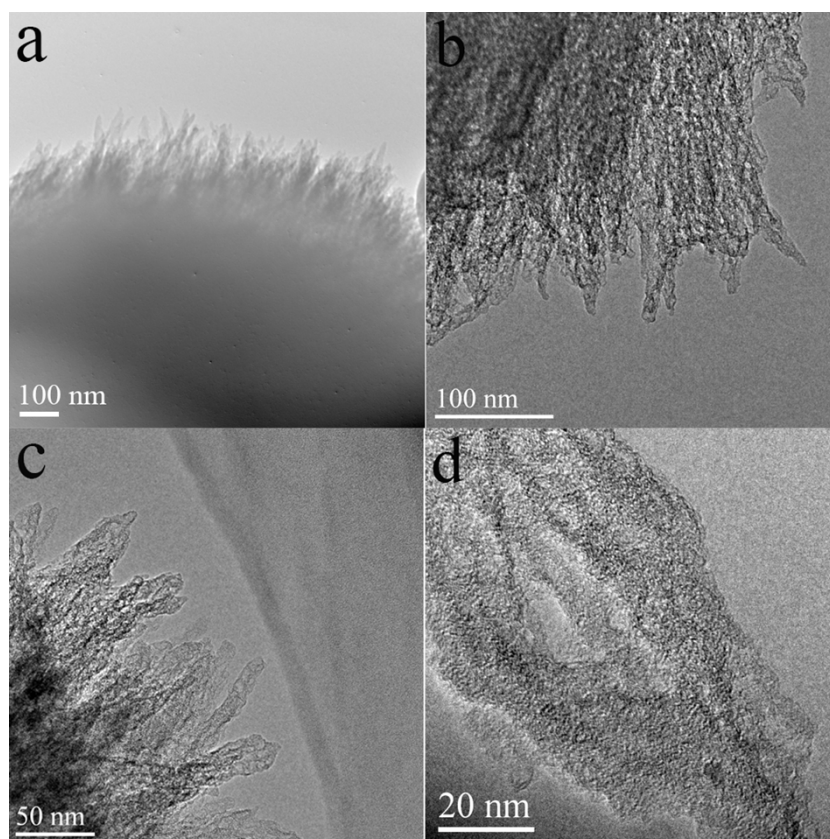

**Fig. S4.** a) TEM image, b, c, d) and HRTEM images of the N-HPC.

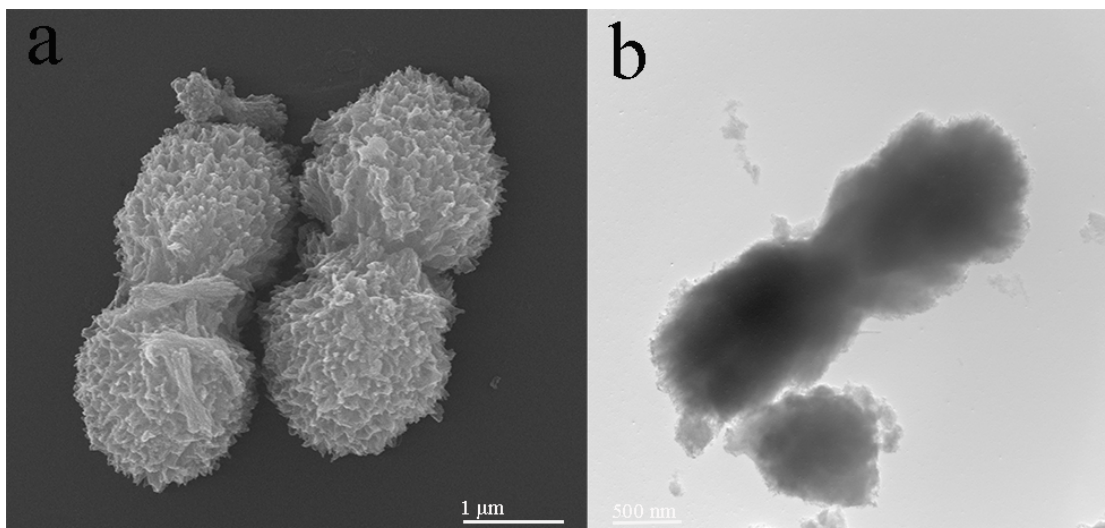

**Fig. S5.** a) SEM image and b) TEM image of the MnO@C templates.

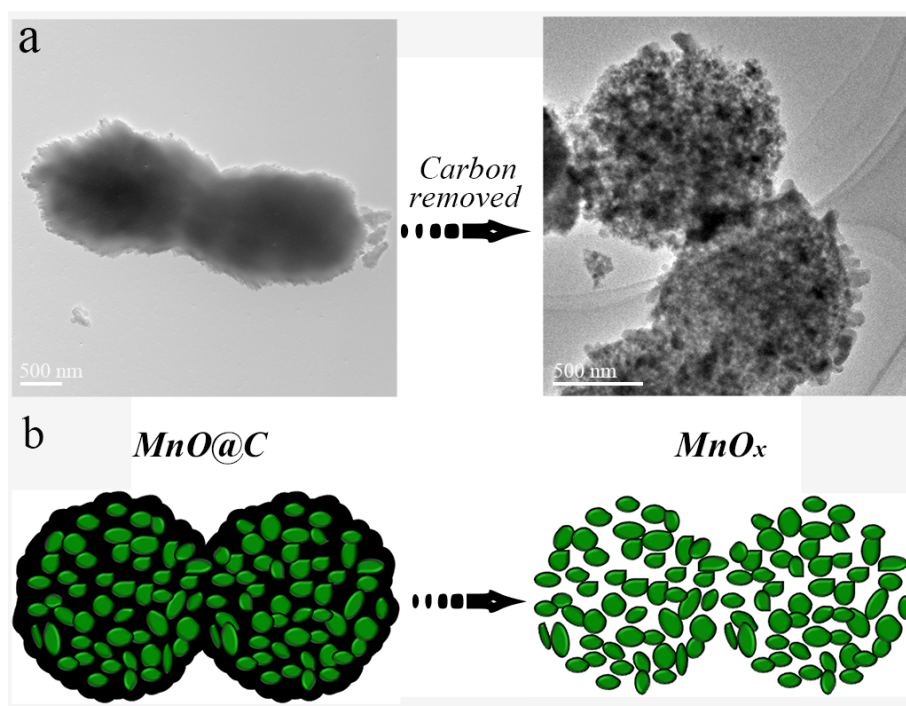

**Fig. S6.** a) TEM images and b) schematic representation of MnO@C phase structure before and after carbon removal.

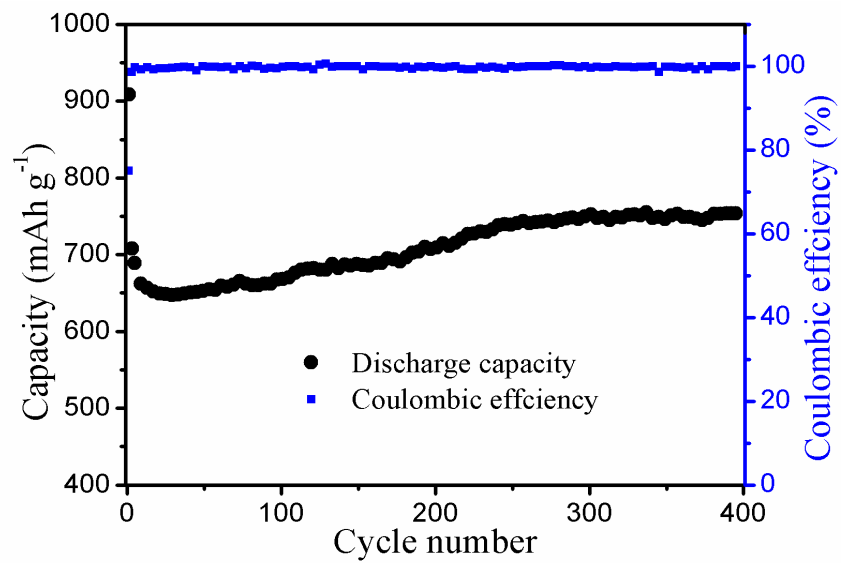

**Fig. S7.** Cycling performance of the N-HPC at the rate of 1.5 A g<sup>-1</sup>.

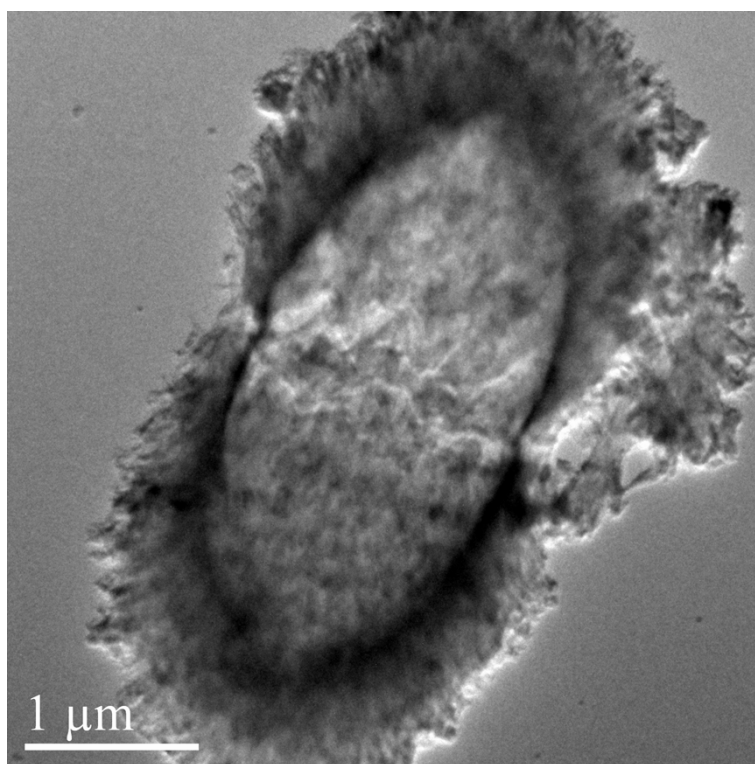

**Fig. S8.** TEM image of the N-HPC after 200 cycles at the rate of 0.1 A g<sup>-1</sup>.

| Table S1. Comparison of the BET surface area and LIBs performances of N-HPC and some other carbon based materials |                                                |                                            |                              |                    |           |
|-------------------------------------------------------------------------------------------------------------------|------------------------------------------------|--------------------------------------------|------------------------------|--------------------|-----------|
|                                                                                                                   | surface area (m <sup>2</sup> g <sup>-1</sup> ) | Reversible capacity (mAh g <sup>-1</sup> ) |                              | Rate-retention (%) | Ref.      |
| N-HPC                                                                                                             | 1322                                           | 1003 at 0.1 A g <sup>-1</sup>              | 613 at 3 A g <sup>-1</sup>   | 61                 | This work |
| Hollow Carbon-Nanotube/<br>Nanofiber                                                                              | 1840                                           | 913 at 0.1 A g <sup>-1</sup>               | 268 at 3 A g <sup>-1</sup>   | 29                 | S1        |
| Carbon Nanofiber Webs                                                                                             | 2381                                           | 1280 at 0.1 A g <sup>-1</sup>              | 505 at 5 A g <sup>-1</sup>   | 39                 | S2        |
| Hollow carbon cage                                                                                                | 1405                                           | 1050 at 0.1 A g <sup>-1</sup>              | 400 at 2.5 A g <sup>-1</sup> | 38                 | S3        |
| Porous carbon                                                                                                     | 916                                            | 1129 at 0.185 A g <sup>-1</sup>            | 664 at 3.7 A g <sup>-1</sup> | 58                 | S4        |
| Mesoporous carbon                                                                                                 | 800                                            | 1780 at 0.1 A g <sup>-1</sup>              | 205 at 4 A g <sup>-1</sup>   | 11                 | S5        |
| Co <sub>3</sub> O <sub>4</sub> @graphene                                                                          | -                                              | 941 at 0.2 A g <sup>-1</sup>               | 450 at 2 A g <sup>-1</sup>   | 47                 | S6        |

| Table S2. Comparison of the supercapacitor performances of N-HPC and some other carbon based materials |                                     |                                          |                               |           |
|--------------------------------------------------------------------------------------------------------|-------------------------------------|------------------------------------------|-------------------------------|-----------|
|                                                                                                        | electrolyte                         | Reversible capacity (F g <sup>-1</sup> ) |                               | Ref.      |
| N-HPC                                                                                                  | 1 M KOH                             | 282 at 0.5 A g <sup>-1</sup>             | 228 at 15 A g <sup>-1</sup>   | This work |
| Mesoporous carbon                                                                                      | 1 M H <sub>2</sub> SO <sub>4</sub>  | 390 at 0.25 A g <sup>-1</sup>            | 270 at 10 A g <sup>-1</sup>   | S5        |
| Porous Carbon Nanofibers                                                                               | 6 M KOH                             | 202 at 1 A g <sup>-1</sup>               | 164.5 at 30 A g <sup>-1</sup> | S7        |
| Microporous Carbon                                                                                     | 1 M H <sub>2</sub> SO <sub>4</sub>  | 340 at 0.1 A g <sup>-1</sup>             | 310 at 0.2 A g <sup>-1</sup>  | S8        |
| Carbon-tipped MnO <sub>2</sub> /mesoporous carbon/MnO <sub>2</sub>                                     | 1 M Na <sub>2</sub> SO <sub>4</sub> | 266 at 1 A g <sup>-1</sup>               | 170 at 40 A g <sup>-1</sup>   | S9        |
| MnO <sub>2</sub> /PEDOT nanowire                                                                       | 1 M Na <sub>2</sub> SO <sub>4</sub> | 210 at 5 mA cm <sup>-2</sup>             | 190 at 25 mA cm <sup>-2</sup> | S10       |
| Carbon nanotube/ $\alpha$ -MnOOH coaxial nanocable                                                     | 1 M Na <sub>2</sub> SO <sub>4</sub> | 202 at 0.65 A g <sup>-1</sup>            | 147 at 16.1 A g <sup>-1</sup> | S11       |

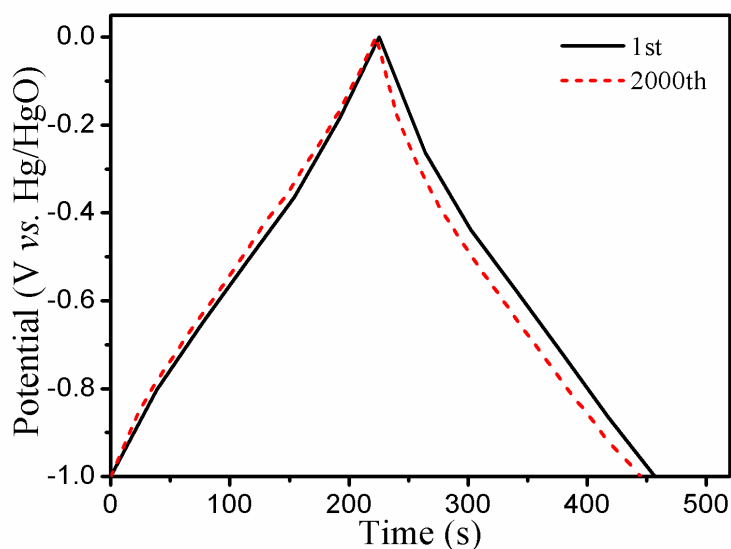

**Fig. S9.** Triangular shapes of the first and 2000<sup>th</sup> cycle.

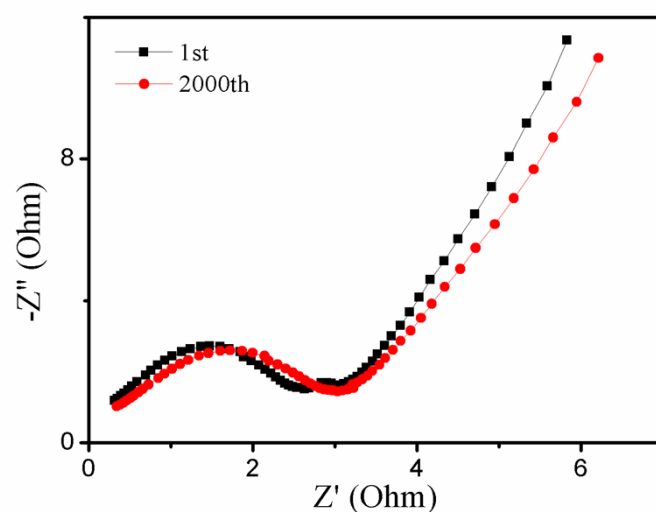

**Fig. S10.** High frequency EIS of the N-HPC.

## References

- [S1] Y. Chen, X. Li, K. Park, J. Song, J. Hong, L. Zhou, Y.-W. Mai, H. Huang and J. B. Goodenough, *J. Am. Chem. Soc.*, 2013, **135**, 16280.
- [S2] L. Qie, W.-M. Chen, Z.-H. Wang, Q.-G. Shao, X. Li, L.-X. Yuan, X.-L. Hu, W.-X. Zhang, and Y.-H. Huang, *Adv. Mater.*, 2012, **24**, 2047
- [S3] G. Zhou, D.-W. Wang, X. Shan, N. Li, F. Li and H.-M. Cheng, *J. Mater. Chem.*, 2012, **22**, 11252.
- [S4] L. Chen, Y. Zhang, C. Lin, W. Yang, Y. Meng, Y. Guo, M. Li and D. Xiao, *J. Mater. Chem. A*, 2014, **2**, 9684.



- [S5] Z. Li, Z. Xu, X. Tan, H. Wang, C. M. B. Holt, T. Stephenson, B. C. Olsen and David Mitlin, *Energy Environ. Sci.*, 2013, **6**, 871.
- [S6] B. Li, H. Cao, J. Shao, G. Li, M. Qu and G. Yin, *Inorg. Chem.*, 2011, **50**, 1628.
- [S7] L.-F. Chen, X.-D. Zhang, H.-W. Liang, M. Kong, Q.-F. Guan, P. Chen, Z.-Y. Wu and S.-H. Yu, *ACS Nano*, 2012, **6**, 7092.
- [S8] C. O. Ania, V. Khomenko, E. Raymundo-Piñero, J.B. Parra and F. Béguin, *Adv. Funct. Mater.*, 2007, **17**, 1828.
- [S9] H. Jiang, L. Yang, C. Li, C. Yan, P. S. Lee and J. Ma, *Energy Environ. Sci.*, 2011, **4**, 1813.
- [S10] R. Liu and S. B. Lee, *J. Am. Chem. Soc.*, 2008, **130**, 2942.
- [S11] Hua Fang, Shichao Zhang, Xiaomeng Wu, Wenbo Liu, Bohua Wen, Zhijia Du, Tao Jiang, *J. Power Sources*, 2013, **235**, 95.
